# Supplementary material
Source: publisher figshare collection journal article supplement (https://plos.figshare.com/ndownloader/files/38516753)
Supplement: Supplementary file 1 [file 38516753]

## Sheet: README
This file is part of the dataset: Public Library of Science (2022) PLOS Open Science Indicators. Figshare. Dataset (version 1). https://doi.org/10.6084/m9.figshare.21687686.
Contact Information
Name:	Iain Hrynaszkiewicz
ORCID:	0000-0002-9673-5559
Institution:	Public Library of Science
Email:	ihrynaszkiewicz@plos.org / plos@plos.org
Alternate Contact Information
Name:	Lauren Cadwallader
ORCID:	0000-0002-7571-3502
Institution:	Public Library of Science
Email:	lcadwallader@plos.org / plos@plos.org
Licence:	CC BY 4.0
Version:	1
Prepared:	2022-12-07
Prepared by:	Lauren Cadwallader
This file contains the summary statistics used to inform the analysis and create the figures in the blog post https://theplosblog.plos.org/2022/12/open-science-indicators-first-dataset.
The 2022 date is for the first half of the year only (Jan 1st - June 30th)

## Sheet: Summary statistics
Data sharing in a repository by year as a percentage of all articles published
*Articles are deemed to have shared a link to data in a repository if "Repositories" column does not contain "N/A"
*Articles are deemed to have data available online if the "URL" column does not contain "N/A"
*"Publication Year" is used to determine publication date.
		2019	2020	2021	2022	Overall rate
PLOS data in a confirmed repository	No. of publications	16407	17377	17671	9863	61318
	No. sharing in a repository	3811	4163	4652	2757	15383
	% sharing in a repository	0.23	0.24	0.26	0.28	0.25
Comparator data in a confirmed repository	No. of publications	1833	2226	2039	490	6588
	No. sharing in a repository	162	266	278	75	782
	% sharing in a repository	0.09	0.12	0.14	0.15	0.12
PLOS data available online	No. of publications	16407	17377	17671	9863	61318
	No. sharing online	4963	5420	6141	3707	20231
	% sharing online	0.3	0.31	0.35	0.37	0.33
Comparator data available online	No. of publications	1833	2226	2039	490	6588
	No. sharing online	450	629	681	171	1932
	% sharing online	0.25	0.28	0.33	0.35	0.29
Open Science Indicator rates by quarter as a percentage of all articles published
*"Publication date" is used to determine quarters only. Some articles with 2022 publication dates have months that fall into the 3rd and 4th Quarters of the year and therefore the 2022 total is lower in this table. A small number (n=20) articles in the Comparator dataset have publication dates in non-standard formats that do not allow for the quarters to be extracted programmatically. These have …
*"Publication Year" is used to determine the publication year. ~3% of the Comparator data has a mismatch between the year as defined by "Publication Year" and "Publication date".
*Data sharing in a repository rates are if the "Repositories" column does not contain "N/A"
*Code sharing rates are the "Code_Shared" column contains "Yes"
*Preprint sharing rates are the "Preprint_Match" column contains "Yes"
	Year	2019				2020				2021				2022
	Quarter	Q1	Q2	Q3	Q4	Q1	Q2	Q3	Q4	Q1	Q2	Q3	Q4	Q1	Q2
PLOS	No. of publications	4379	4270	3942	3816	3752	4349	4383	4893	4709	4489	4548	3925	4130	4130
PLOS	No. sharing in a repository	993	991	888	939	863	1036	1038	1226	1224	1154	1233	1041	1140	1175
PLOS	% sharing in a repository	0.226764	0.232084	0.225266	0.246069	0.230011	0.238216	0.236824	0.250562	0.259928	0.257073	0.271108	0.265223	0.276029	0.284504
Comparator	No. of publications	460	475	443	450	504	582	569	570	577	534	509	419	339	124
Comparator	No. sharing in a repository	45	39	45	33	63	65	67	71	66	75	76	61	55	20
Comparator	% sharing in a repository	0.0978261	0.0821053	0.10158	0.0733333	0.125	0.111684	0.11775	0.124561	0.114385	0.140449	0.149312	0.145585	0.162242	0.16129
PLOS	No. of publications	4379	4270	3942	3816	3752	4349	4383	4893	4709	4489	4548	3925	4130	4130
PLOS	No. sharing code	419	397	373	406	364	433	475	564	536	563	621	531	601	602
PLOS	% sharing code	0.0956839	0.0929742	0.094622	0.106394	0.0970149	0.0995631	0.108373	0.115267	0.113825	0.125418	0.136544	0.135287	0.145521	0.145763
Comparator	No. of publications	460	475	443	450	504	582	569	570	577	534	509	419	339	124
Comparator	No. sharing code	33	30	24	24	37	30	51	47	57	51	48	42	53	19
Comparator	% sharing code	0.0717391	0.0631579	0.0541761	0.0533333	0.0734127	0.0515464	0.0896309	0.0824561	0.0987868	0.0955056	0.0943026	0.100239	0.156342	0.153226
PLOS	No. of publications	4379	4270	3942	3816	3752	4349	4383	4893	4709	4489	4548	3925	4130	4130
PLOS	No. of preprints	670	722	704	709	724	867	917	1213	1174	1093	1125	896	957	997
PLOS	% sharing a preprint	0.153003	0.169087	0.17859	0.185797	0.192964	0.199356	0.209217	0.247905	0.24931	0.243484	0.247361	0.22828	0.231719	0.241404
Comparator	No. of publications	460	475	443	450	504	582	569	570	577	534	509	419	339	124
Comparator	No. of preprints	47	58	47	59	86	115	125	122	142	135	121	75	71	37
Comparator	% sharing a preprint	0.102174	0.122105	0.106095	0.131111	0.170635	0.197595	0.219684	0.214035	0.246101	0.252809	0.237721	0.178998	0.20944	0.298387
Code sharing by year as a percentage of all articles published
*Articles are deemed to have shared code if the "Code_Shared" column contains "Yes"
*"Publication Year" is used to determine publication date.
		2019	2020	2021	2022	Overall rate
PLOS	No. of publications	16407	17377	17671	9863	61318
	No. sharing code	1595	1836	2251	1422	7104
	% sharing code	0.0972146	0.105657	0.127384	0.144175	0.12
Comparator	No. of publications	1833	2226	2039	490	6588
	No. sharing code	111	165	198	76	550
	% sharing code	0.0605565	0.074124	0.0971064	0.155102	0.08
